# Supplementary material for: Micro-concentration Lipopolysaccharide as a Novel Stimulator of Megakaryocytopoiesis that Synergizes with IL-6 for Platelet Production
Source: PubMed Central journal article supplement (PMC4557119; doi:10.1038/srep13748), 2015-09-02

Supplementary information

**Micro-concentration Lipopolysaccharide as a Novel  
Stimulator of Megakaryocytopoiesis that Synergizes with IL-6 for  
Platelet Production**

Di Wu, Jun Xie, Xuejun Wang, Bingcheng Zuo, Yin Yu, Tao Jing, Songmei Zhang, Qing Zhang

**Figure S1 | Effects of LPS on IL-6-induced NF- $\kappa$ B transcriptional activity and NF- $\kappa$ B-DNA binding activity.** (A) Cells were transiently transfected with a pNF- $\kappa$ B-luc reporter construct with the pRL-TK vector as an internal control. After transfection, the cells were pretreated with IL-6 either alone or in combination with LPS (0.1, 10, and 1000 ng/ml) for 48 h, and luciferase activity was measured. (B) The effect of LPS plus IL-6 on the NF- $\kappa$ B p65 binding activity in the nuclear extracts from 293T cells was measured using the ELISA-based NF- $\kappa$ B assay, as described in the Methods section. The experiments were repeated three times, and similar results were obtained.

**Figure S2 | Proposed model for the regulation of thrombocytopoiesis via the LPS/IL-6 signaling pathway.** Activation of TLR4 by the administration of LPS or release of LPS from the gut microbiota potentiates the production of NF- $\kappa$ B and enhances the NF- $\kappa$ B p65 DNA binding activity. Meanwhile, the up-regulated IL-6 can bind the increased IL-6R to initiate an autocrine loop and mediate p38 MAPK activation. The up-regulation of these costimulatory molecules effectively activates megakaryocytopoiesis and platelet production through distinct but overlapping TLR4- and IL-6R-dependent molecular mechanisms.

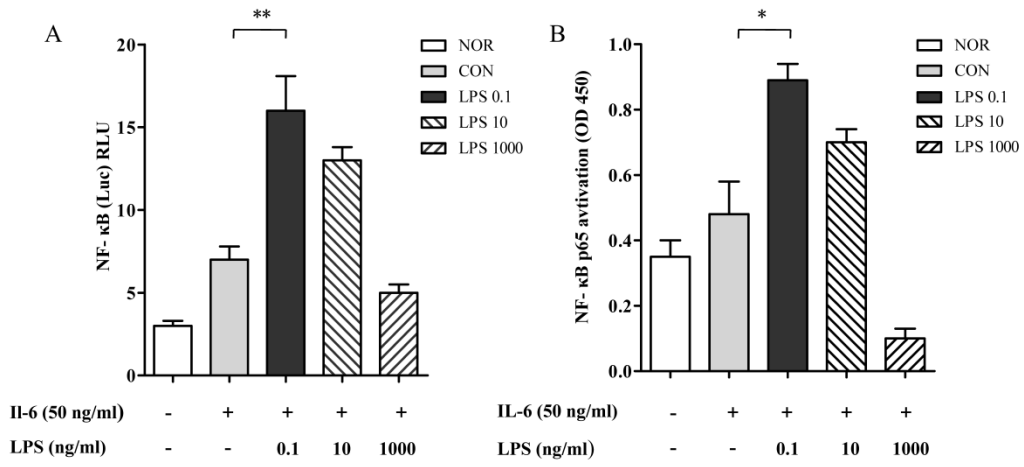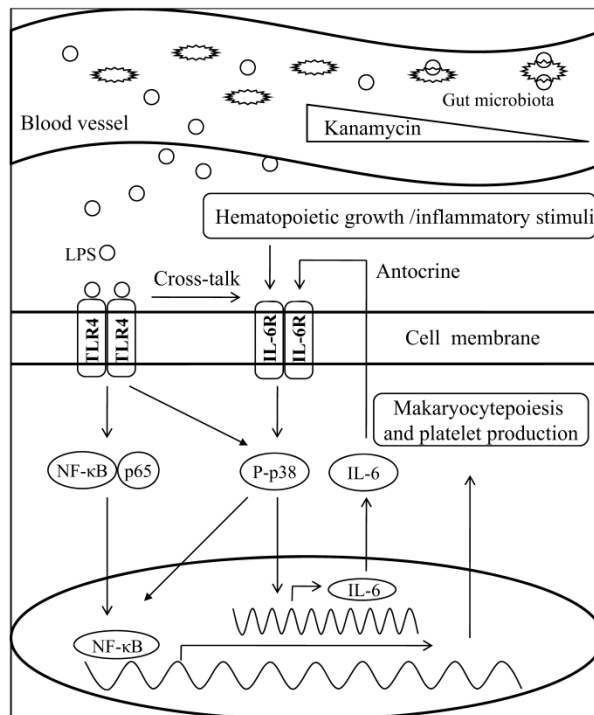

Supplement: srep13748-s1.pdf [file srep13748-s1.pdf]
